# Supplementary material for: Broad Auto-Reactive IgM Responses Are Common In Critically Ill COVID-19 Patients
Source: Res Sq. 2020 Dec 31:rs.3.rs-128348. Preprint. [Version 1] doi: 10.21203/rs.3.rs-128348/v1 (PMC7781325; doi:10.21203/rs.3.rs-128348/v1)
Supplement: 5 [file 6654400afb54d18cdc516514.xlsx]

## Sheet: Sheet1
	COVID-19 ICU
GeneSymbol	Patient 1	Patient 2	Patient 3	Patient 4	Patient 5
AAMP	0.449	4.898	0.26	1.452	0.273
ABHD5	0.142	4.562	-0.001	0.105	0.876
ABHD6	0.021	4.343	1.314	0.117	0.271
ABLIM3	6.284	1.122	1.777	1.266	0.539
ACADVL	0.331	3.169	9.01	2.384	0.912
ACCS	20.815	0.626	-0.038	0.021	0.159
ACRC	0.64	1.246	3.315	4.255	0.179
ACY1	16.657	2.526	1.319	2.288	0.846
ADH5	1.453	11.601	3.506	7.664	1.261
ADPRHL1	0.679	3.818	8.323	2.721	0.847
AES	0.485	1.623	5.838	0.334	0.312
AGTR1	6.166	0.526	0.057	-0.123	0.176
AK056246.1_frag	0.215	0.904	0.542	0.544	4.423
AKR1A1	0.103	1.995	1.117	8.236	1.721
AKR7A2	0.814	8.58	1.372	4.639	1.541
ALDH1L1	36.901	3.506	3.485	3.268	1.268
ALDH7A1	1.868	4.768	2.735	7.171	3.426
ALDOC	0.45	2.916	1.063	19.391	1.026
ALG8	0.138	1.287	0.036	6.588	0.393
ALOX15B	0.986	4.45	0.222	3.112	1.157
ANAPC15	0.395	0.426	2.048	4.748	0.634
ANXA10	1.827	7.105	5.422	11.002	1.923
AP1AR	5.876	-0.259	0.052	0.117	0.016
APBB1	0.843	1.777	4.081	6.913	3.845
API5	29.874	0.219	0.02	0.292	0.013
APOBEC1	5.599	2.485	0.281	1.398	0.902
ARHGDIA	0.296	0.933	0.127	0.851	32.829
ARHGEF16	0.807	9.347	6.54	18.603	10.048
ARIH2	0.238	1.806	0.558	6.931	0.61
ARPC5	-0.111	0.249	7.908	-0.25	0
ASAP2	0.014	0.78	7.04	0.869	0.557
ATG12	-0.001	0.697	4.262	0.406	0.407
BAG3	0.186	0.797	4.848	0.34	0.128
BC104209_frag	0.433	1.429	0.59	6.323	0.271
BCL3	0.739	1.659	7.083	6.191	0.243
BCL7B	0.453	1.464	2.516	4.67	0.659
BIN2	0.258	-0.158	3.549	4.543	0.081
BLOC1S4	0.585	1.806	3.751	7.34	0.278
BOP1	0.817	1.682	6.764	2.168	0.639
C16orf45	0.065	0.502	-0.219	6.023	0.37
C1QTNF4	1.615	2.066	5.225	1.885	0.536
C4orf33	0.144	1.275	1.138	5.199	0.384
C6orf106	0.179	0.396	0.441	6.209	0.453
CABP1	0.755	1.264	0.206	0.706	15.673
CALML3	0.712	1.092	0.143	7.472	0.667
CAP2	0.238	0.862	4.246	3.683	0.845
CASQ1	1.359	1.635	6.146	2.968	1.324
CCDC102A	0.487	1.446	3.293	3.178	6.764
CCDC53	0.701	2.125	7.674	4.567	0.371
CCDC97	0.464	0.98	5.215	2.042	0.621
CDC34	0.575	2.857	0.978	2.793	27.933
CDCA3	0.292	0.261	4.369	1.771	0.374
CDO1	0.221	1.936	7.221	3.93	1.574
CENPC	-0.062	-0.424	4.028	-0.268	-0.127
CFL1	0.374	3.641	0.425	0.64	8.429
CHAMP1	0.244	0.402	4.528	3.052	5.868
CHORDC1	0.86	2.609	2.282	3.022	5.717
CHRNA7	0.239	5.565	0.654	0.628	0.656
CIAO1	0.395	3.506	0.462	6.666	1.036
CIAPIN1	0.092	1.37	0.765	5.036	0.516
CIRBP	0.651	6.361	2.027	1.218	1.275
CMTM3	0.254	1.051	5.327	0.755	0.159
COL14A1	0.049	0.609	1.17	4.219	0.087
CORO1B	0.272	1.175	0.185	9.005	0.329
CROCCP2	0.156	4.326	0.616	0.051	0.45
CXCL16	0.172	1.913	0.51	4.411	0.612
CYB5R3	0.502	2.886	1.143	5.668	0.757
DCK	0.583	4.355	0.542	1.103	1.009
DCX	0.223	1.122	0.962	9.294	0.254
DHX32	1.165	5.37	0.824	1.957	0.802
DLG3	0.304	0.963	0.196	1.44	8.129
DNAJA1	0.135	0.101	-0.214	-0.238	16.767
DOK1	0.502	2.031	2.437	5.944	1.196
DOK2	0.55	1.594	6.673	2.523	0.401
DPP3	4.306	0.886	-0.076	2.613	0.33
DR1	0.501	1.523	0.6	5.247	0.261
DUSP22_frag	5.796	0.957	0.771	0.905	0.43
EAF1	0.738	1.033	4.411	4.754	0.278
ECE2	0.332	20.864	0.334	0.55	1.093
EFHD1	-0.051	-0.253	6.513	-0.147	0.162
EHD1	0.118	0.839	13.725	0.43	0.119
ERP27	2.245	3.877	1.473	8.097	1.024
FAM131C	0.731	2.774	6.274	8.879	0.96
FAM84A	3.419	21.926	8.589	23.222	2.169
FANCI_frag	0.246	2.632	1.649	4.573	0.685
FARSB	0.054	1.022	4.283	0.069	0.259
FETUB	-0.148	-0.512	7.493	-0.406	-0.201
FGD2	0.459	1.765	5.023	3.088	0.409
FNBP4	0.003	-0.388	6.301	-0.304	-0.139
FRMD8	4.574	8.308	2.011	4.164	2.603
FRS2	-0.071	-0.371	4.086	0.418	-0.184
G6PD	0.517	4.161	11.277	1.951	0.976
GDI1	0.065	0.792	-0.022	4.507	0.428
GID8	0.551	1.529	4.262	0.574	0.597
GPA33	0.115	-0.447	0.111	4.958	-0.193
GPBP1_frag	0.578	1.476	2.447	7.045	0.623
GPHN	1.401	5.913	3.57	10.04	2.864
GPS1	0.318	1.747	0.435	4.08	0.888
GSS	0.633	2.821	1.383	7.767	0.593
GSTA2	0.166	5.588	0.185	1.013	0.76
GUCD1	0.093	2.721	-0.07	5.127	0.971
HCN1	0.317	2.833	6.152	1.831	1.055
Hep B Protein X	0.039	-0.265	13.262	0.478	0.152
HEYL	-0.036	0.579	14.561	0.153	0.162
HINFP	60.052	0.786	0.819	1.013	0.233
HINT1	0.018	0.679	-0.145	7.328	0.186
HMBS	1.126	1.972	1.723	9.685	1.082
HMOX2	0.156	1.323	0.654	4.399	0.869
HNRNPAB	0.898	2.113	1.798	4.633	0.601
HNRNPC	0.331	0.384	0.808	6.931	0.015
HSD17B8	0.094	0.414	-0.113	-0.027	4.92
HSPA13	0.825	1.883	2.495	7.875	0.821
IAH1	0.294	2.444	17.839	0.057	0.698
IFIH1	4.029	1.747	-0.092	1.488	1.019
IGHG1	1.03	11.382	23.641	7.045	18.803
IGHG3	0.711	6.851	17.116	4.934	13.79
IL21	0.033	0.591	-0.209	4.928	0.058
INTS4	0.06	0.408	0.137	4.507	0.08
IRF2BP1	0.216	1.116	7.503	1.759	2.237
IRF2BP2	0.122	0.532	12.661	0.694	0.011
IRS1	1.15	1.582	3.735	9.017	1.29
KCNN4	6.607	1.028	0.121	0.358	0.161
KCTD7	1.048	6.055	12.735	4.597	1.448
KEAP1	0.592	4.19	6.7	1.849	1.329
KIF25	5.236	0.715	0.201	-0.274	0.73
LARP7	0.219	1.688	1.01	5.89	0.594
LETM2	4.398	1.505	5.124	0.075	0.671
LGALS1	0.304	2.054	5.891	3.377	1.126
LGALS4	0.093	0.915	6.487	2.294	0.014
LIMCH1	1.455	1.635	5.444	1.963	0.634
LIMS1	2.732	6.833	2.74	8.825	21.379
LRRC39	-0.03	-0.052	-0.001	6.179	0.061
LXN	2.624	0.656	4.039	1.356	0.876
LYN	0.866	1.446	8.775	2.066	1.058
MAGEA11	0.665	1.677	2.9	4.459	0.343
MAP1A	0.136	-0.383	5.06	0.322	1.164
MAPK11	0.26	2.107	0.175	7.189	1.344
MARCKSL1	-0.005	0.786	6.647	0.731	0.081
MCM6	0.404	1.47	12.182	1.35	0.542
MIIP	0.119	1.205	5.098	0.49	0.741
MPRIP	22.461	0.502	0.27	0.797	0.71
MRAP2	0.072	0.632	-0.06	0.694	4.042
MRI1	0.049	1.488	1.101	9.92	0.412
MRPL1	0.342	1.417	0.552	8.35	0.34
MTCP1	2.359	1.8	4.773	0.923	0.524
MTERF4	0.249	1.187	6.327	2.559	0.451
MTMR7	-0.164	-0.548	-0.395	-0.52	8.209
MTUS1	1.011	1.977	4.251	7.965	0.738
MUC20	0.416	0.296	10.016	0.28	-0.068
MVP	0.553	2.65	2.415	4.633	1.361
MYF5	0.189	1.081	4.086	1.2	0.008
MYLK	0.786	2.597	10.34	2.384	0.285
MYPN	0.474	0.762	5.508	2.066	0.404
NAT1	0.424	3.535	1.218	4.219	10.918
Nc2b	0.505	1.128	0.531	5.433	0.163
NCL	0.224	0.449	1.798	1.091	4.563
NFKBIB	8.134	2.532	1.505	2.703	1.015
NNMT	0.113	0.839	33.806	0.322	0.846
NOL3	0.018	0.302	0.616	5.415	-0.264
Nol3	0.136	0.202	0.866	4.513	-0.268
NUDCD1	11.229	0.473	0.095	1.975	0.531
NUDT16	1.067	7.642	4.289	2.613	2.656
NUDT21	-0.029	-0.105	-0.273	8.5	0.048
OPLAH	0.449	8.043	1.223	2.336	0.924
OSCP1	-0.11	-0.076	6.567	-0.232	0.06
P2RY6	4.396	0.001	-0.23	0.057	0.276
PAF1	0.569	0.75	5.529	4.351	-0.016
PAGE4	0.252	1.175	7.472	2.643	3.548
PAPSS1	0.467	2.55	4.342	1.903	1.375
PARP1	0.046	-0.377	5.438	-0.093	-0.201
PBK	0.117	2.78	0.606	4.279	0.339
PCP2	0.185	1.328	6.471	0.496	0.342
PCP4L1	103.468	0.827	0.803	0.033	0.357
PCSK2	1.268	1.623	7.008	1.939	0.479
PCYT1B	0.712	2.332	4.677	7.412	0.624
PICK1	0.238	1.812	0.089	5.566	0.619
PLCD4	0.154	2.55	4.858	0.604	0.779
PLEKHA4	0.851	1.205	4.651	3.058	0.096
PNMA2	0.882	4.609	2.069	7.099	1.355
PNP	0.671	4.214	2.836	2.631	7.067
PPP2R2D	4.951	0.957	1.031	-0.172	0.156
PPP2R3C	0.163	0.762	0.217	5.987	0.199
PRAM1	-0.164	-0.695	4.576	-0.352	-0.356
PRB3_frag	1.214	1.098	0.962	0.893	5.786
PRDX4	0.388	5.553	1.729	2.276	2.022
PRKCDBP	0.168	0.674	10.654	0.544	0.013
PSMA5	0.261	1.948	-0.044	5.283	0.481
PSME1	0.337	1.859	0.398	13.654	1.118
PTEN	0.878	4.267	4.677	7.568	0.991
PTP4A1	0.632	3.205	1.388	4.627	0.514
PVRL3_frag	0.1	1.305	0.787	7.141	0.626
QPRT	0.693	4.644	3.006	11.603	1.182
RABGGTB	0.687	4.343	1.984	5.349	1.513
RASGRP3	0.382	2.402	1.691	7.442	0.608
RASSF3	32.293	1.635	-0.054	-0.099	0.432
RBM3	1.143	1.783	0.371	5.415	0.468
RBM46	0.111	1.258	2.186	0.785	41.007
RCVRN	0.303	0.833	-0.129	1.5	39.108
RGS19	4.003	1.918	0.521	4.339	1.223
RWDD1	0.35	0.526	2.878	4.309	0.467
SCOC	0.128	0.886	7.935	1.44	0.545
SCYL3	0.024	0.644	14.257	1.843	0.283
SEC31A	-0.113	-0.442	-0.411	-0.19	11.956
SEPT4	8.511	0.443	8.03	1.819	0.602
SEPT9	0.13	0.06	7.051	2.829	0.055
SGF29	0.299	1.848	0.765	0.544	88.014
SH3BGR	0.074	0.98	0.206	5.343	0.133
SHFM1	-0.008	0.426	-0.06	4.772	0.186
SHMT1	0.904	3.435	0.611	4.67	0.855
SHTN1	0.109	0.809	4.667	0.712	0.276
SLA2	0.26	0.609	-0.033	4.453	0.102
SLC35C2	0.238	0.131	-0.038	6.756	-0.036
SLC7A6OS	0.688	1.376	8.227	3.755	0.257
SMAD1	7.785	2.674	6.141	7.574	0.537
SNX16	0.319	0.845	5.156	4.724	0.097
SNX3	5.118	-0.306	-0.384	-0.172	-0.064
SNX9	0.836	2.804	17.914	2.541	1.109
SRSF11	0.271	0.591	7.519	1.651	0.321
SRSF6	0.757	1.24	10.974	6.395	0.714
SRSF7	1.154	3.565	10.537	8.055	0.644
STX8	-0.096	-0.099	10.601	-0.015	-0.067
SULT2B1	0.371	1.482	15.95	4.339	0.642
SUPT5H	0.714	2.739	10.872	3.623	0.24
TCP10L	0.135	1.045	0.723	4.994	0.323
TFPT	0.269	0.951	6.173	1.218	0.169
THEM5	0.743	2.355	0.568	1.927	8.254
THOP1	0.181	3.553	4.193	2.054	0.985
TIMM8A	0.136	0.119	4.055	0.189	0.157
TIPARP	-0.103	-0.565	5.167	-0.316	-0.2
TJP1	0.215	0.095	6.295	0.424	-0.199
TMEM120A	0.558	5.813	1.675	3.154	2.939
TMEM44	0.46	1.559	5.172	7.153	0.196
TMEM52B	-0.085	-0.152	5.641	-0.292	0.075
TNS2	0.44	0.674	5.417	2.613	0.47
TRAFD1	0.236	1.854	1.963	0.725	5.185
TRIM28	0.493	0.75	6.168	0.592	0.185
TRIM7	-0.02	0.432	-0.145	27.221	0.196
TRMT13	0.267	1.7	0.01	4.609	1.202
TSPAN10	0.186	1.187	0.201	0.286	4.337
TSTA3	0.318	2.072	0.441	6.179	1.076
TTC5	0.143	1.039	8.201	0.881	0.324
UAP1	0.936	1.854	1.165	28.502	0.882
UBE2R2	0.618	2.302	1.574	2.865	28.498
UBL7	1.151	3.724	8.733	5.866	1.608
UQCRH	11.64	1.24	-0.049	0.123	0.9
URI1	0.097	0.52	4.997	0.123	-0.047
WASF2	0.512	1.134	5.864	3.527	0.264
WASF3	0.07	-0.194	5.257	1.326	1.812
WDR55	0.505	2.467	5.838	1.362	0.607
WT1-AS	-0.143	4.054	-0.299	-0.448	-0.279
XAGE2	0.757	1.511	10.734	1.771	0.282
XRCC4	0.192	2.208	7.498	0.394	0.253
YP021	29.52	1.122	-0.081	-0.153	0.21
ZCRB1	0.422	0.856	6.593	0.37	0.773
ZKSCAN4	0.172	0.845	0.584	4.549	0.215
ZNF580	-0.153	-0.489	-0.288	6.45	-0.218
ZNF677	0.136	0.756	5.401	0.538	0.128
ZNF746	1.116	11.129	2.958	2.324	3.603
ZNRD1	0.045	1.317	-0.145	5.133	0.529
ZYX	0.122	1.948	1.383	5.421	0.213
